# Supplementary material
Source: Research Square preprint supplement (doi:10.21203/rs.3.rs-9419820/v1)
Supplement: Supplementary file 1 [file c1ba15261d6dabb10f5a1498.docx]

**Supplementary Information**

**Radiochemistry and Comparative In Vitro Assessment of PSMA-617 Labeled with Lead-212 (212Pb), Actinium-225 (225Ac), and Lutetium-177 (177Lu).**

Abhijit Bera1, Graham Ragland1, Yuhan Zhang2, Patricia G. Madel2, Jasmine B'Lanton2, Atchimnaidu Siriki1, Chin-Tu Chen1, Russell Z. Szmulewitz2, Satish K. Chitneni1*

1Department of Radiology and 2Department of Medicine, The University of Chicago, Chicago, IL, USA

*Correspondence: [schitneni@uchicago.edu](mailto:schitneni@uchicago.edu)

**Table of Contents**

Synthesis scheme and LC-MS analysis of nonradioactive Lu-PSMA-617…………………………p2

Synthesis scheme and LC-MS analysis of nonradioactive Pb-PSMA-617 ……………………….p3

Radiolabeling and QC analysis of [177Lu]Lu-PSMA-617…………………………………………….p4

Radiolabeling and QC analysis of [225Ac]Ac-PSMA-617………………….………………………….p5

Radiolabeling and QC analysis of [212Pb]Pb-PSMA-617………………...……………………….....p6

Stability profiles of [177Lu]Lu-PSMA-617, [225Ac]Ac-PSMA-617 and [212Pb]Pb-PSMA-617……….p7

Cell uptake of the three radioligands in LNCaP-AR and DU145-PSMA cell lines………….………p8

Binding affinity assay of [225Ac]Ac-PSMA-617 without DTPA in the incubation medium………....p9

**A**


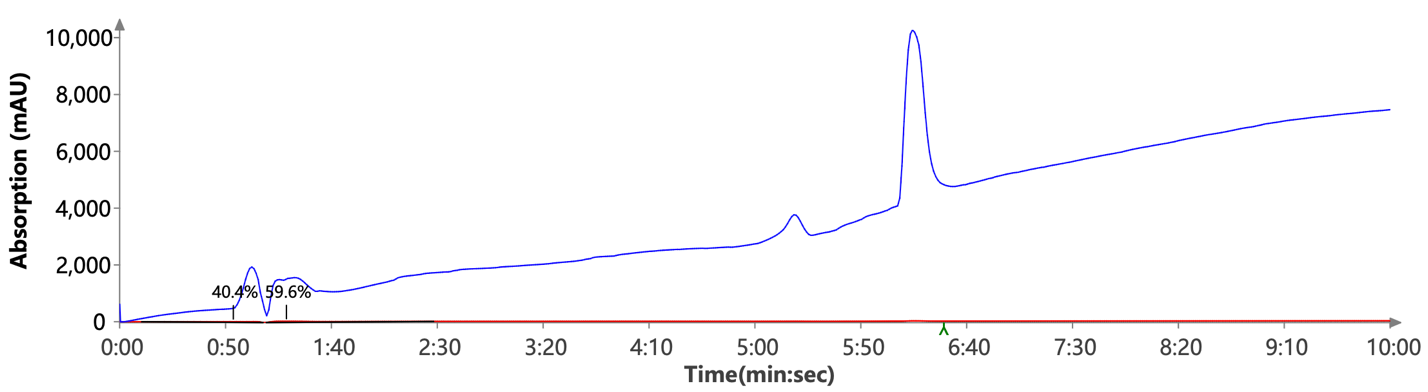

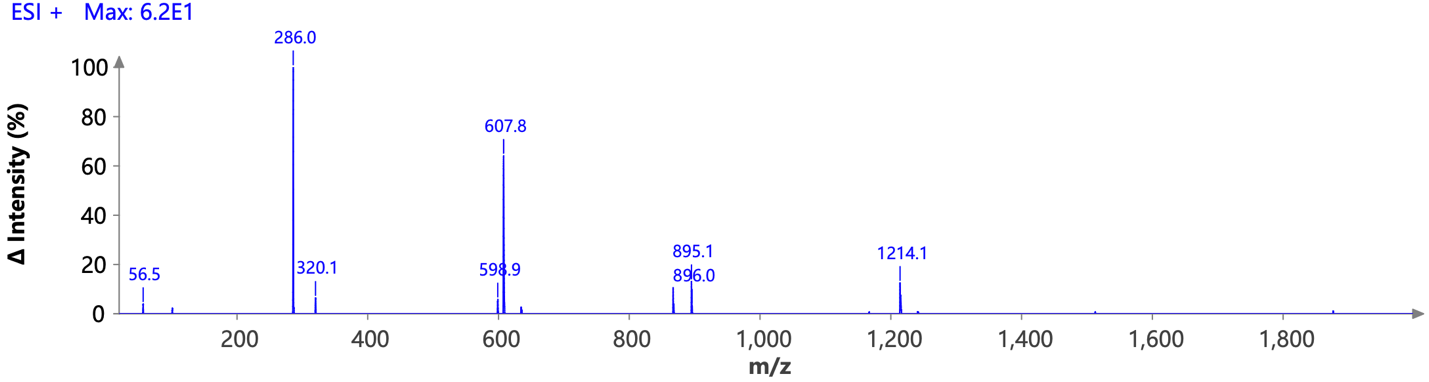


**B**

**Figure S1.** (**A**)Synthesis scheme for the nonradioactive Lu-PSMA-617. (**B**) LC-MS analysis of the purified Lu-PSMA-617 (*m/z*: 1214.1 [M+H]+).

**A**


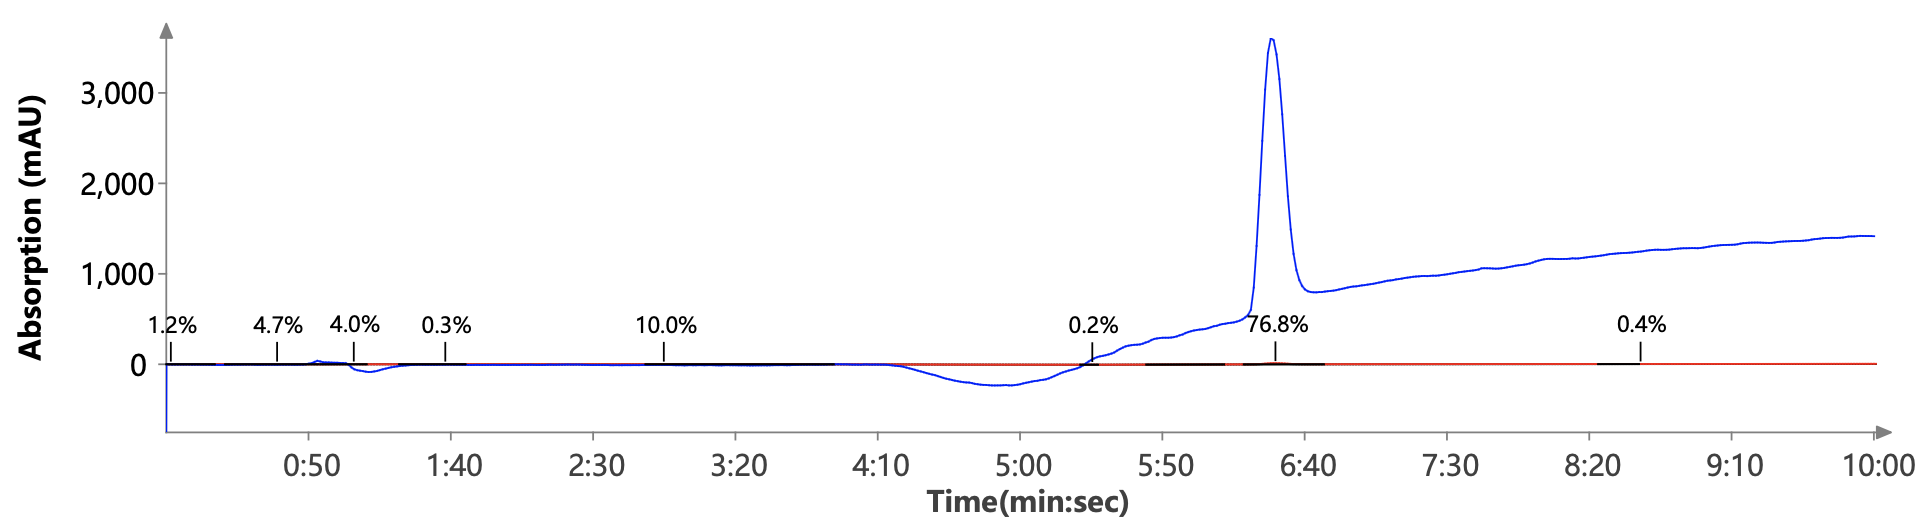

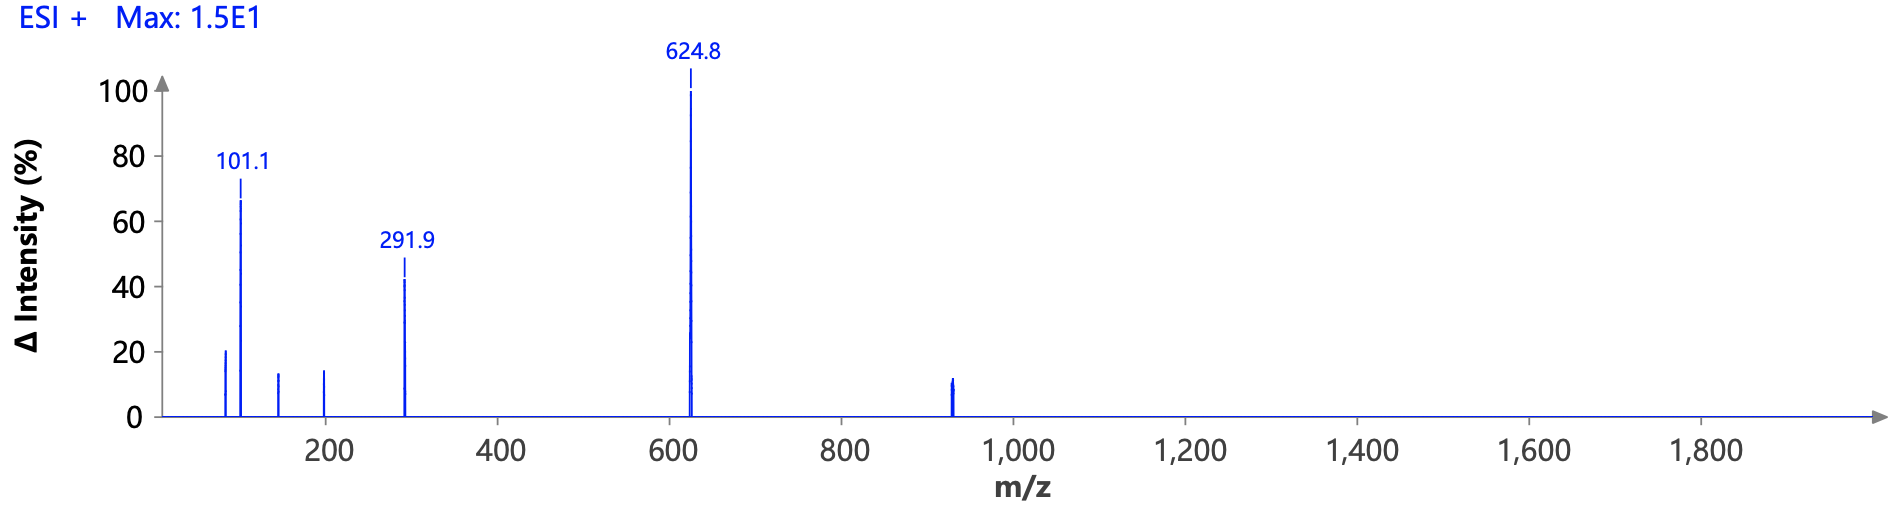


**B**

**Figure S2.** (**A**)Synthesis scheme for the nonradioactive Pb-PSMA-617. (**B**) LC-MS analysis of the purified Pb-PSMA-617 (*m/z*: 1247.46 ([M+H]+), *m/z*: 624.8 ([M+2H]+2)).

**A**

**B**

**C**

[177Lu]Lu-PSMA-617

[177Lu]Lu-PSMA-617

Free 177Lu

**Figure S3.** (**A**)Radiolabeling of PSMA-617 with 177Lu. (**B**) Radio-HPLC chromatogram of the crude labeling mixture of [177Lu]Lu-PSMA-617. (**C**) Radio-HPLC chromatogram of [177Lu]Lu-PSMA-617 after Sep-Pak purification.

**A**


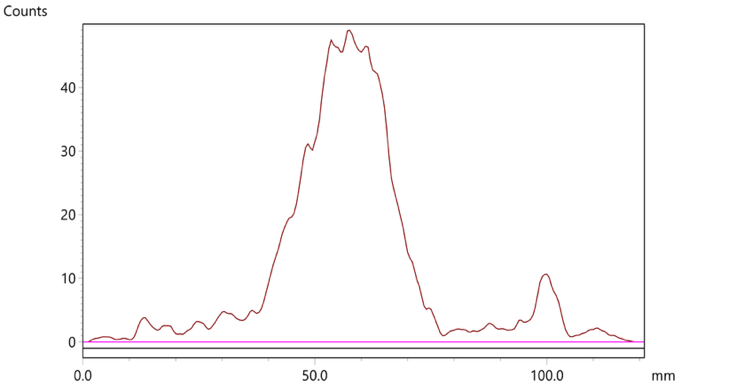


**B**

[225Ac]Ac-PSMA-617

Free 225Ac


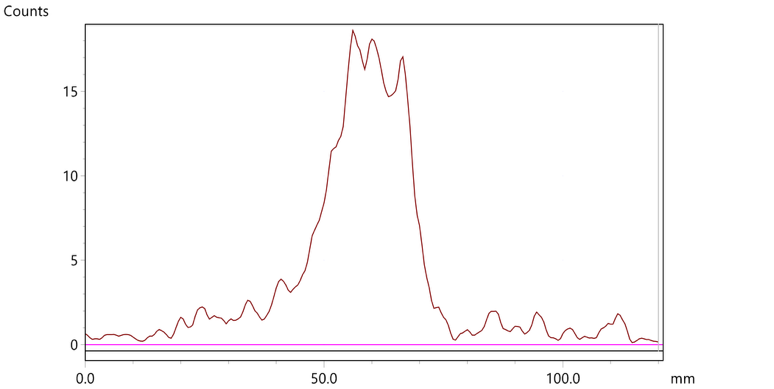


**C**

[225Ac]Ac-PSMA-617

**Figure S4.** (**A**) Radiolabeling of PSMA-617 with 225Ac. (**B**) iTLC chromatogram of the crude labeling mixture of [225Ac]Ac-PSMA-617. (**C**) iTLC chromatogram of [225Ac]Ac-PSMA-617 after Sep-Pak purification.

**B**

Free 212Pb

[212Pb]Pb-PSMA-617

**C**

[212Pb]Pb-PSMA-617

**A**

**Figure S5.** (**A**) Radiolabeling of PSMA-617 with 212Pb. (**B**) Radio-HPLC chromatogram of the crude labeling mixture of [212Pb]Pb-PSMA-617. (**C**) Radio-HPLC chromatogram of [212Pb]Pb-PSMA-617 after Sep-Pak purification.

**A**

**B**

**C**

**Figure S6.** In vitro stability of [177Lu]Lu-PSMA-617 (**A**), [225Ac]Ac-PSMA-617 (**B**), and [212Pb]Pb-PSMA-617 (**C**) in PBS, human serum, and human whole blood.

**A**

**B**

**Figure S7.** Comparison of the cell uptake of [177Lu]Lu-PSMA-617, [212Pb]Pb-PSMA-617, and [225Ac]Ac-PSMA-617, in the PSMA-positive LNCaP-AR cell line (**A**), and in the PSMA-overexpressing DU145-PSMA cell line (**B**).

**Figure S8**. Saturation binding assay of [225Ac]Ac-PSMA-617 in the PSMA-positive LNCaP-AR cell line with no DTPA in the incubation medium.

**Scheme 3.** Radiolabeling of PSMA-617 with 225Ac.


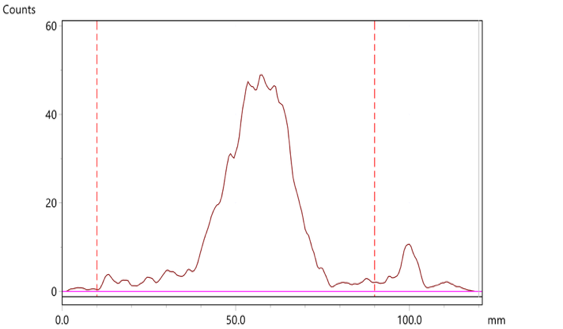

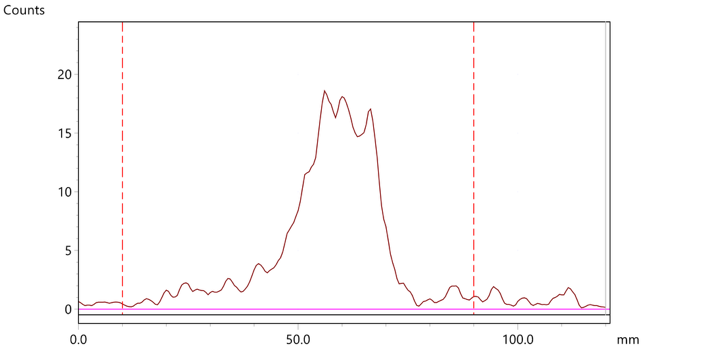


**A**

**B**

225Ac-PSMA-617

**Fig. 7.** iTLC analysis of the 225Ac-PSMA-617 crude reaction mixture (A) and afterpurification with aSep-Pak (B). Analysis was done immediately after the reaction.

225Ac

225Ac-PSMA-617
